# Supplementary material for: Supramolecular BODIPY-Zn(ii)-bisporphyrin dyad and trinitrofluorenone encapsulated triad as models of antenna-reaction center: synthesis, structure and photophysical properties
Source: Royal Society of Chemistry journal article supplement (doi:10.1039/c3dt50956g), 2013-01-01
Supplement: c3dt50956g.pdf [file c3dt50956g.pdf]

## Supporting Informations

### **Supramolecular BODIPY-Zn(II)-Bisporphyrin Dyad and Trinitrofluorenone Encapsulated Triad as Models of Antenna-reaction Center: Synthesis, Structure and Photophysical Properties**

Pritam Mondal, Arvind Chaudhary and Sankar Prasad Rath\*

*Department of Chemistry, Indian Institute of Technology Kanpur, Kanpur-208016, INDIA. Email: [sprath@iitk.ac.in](mailto:sprath@iitk.ac.in)*

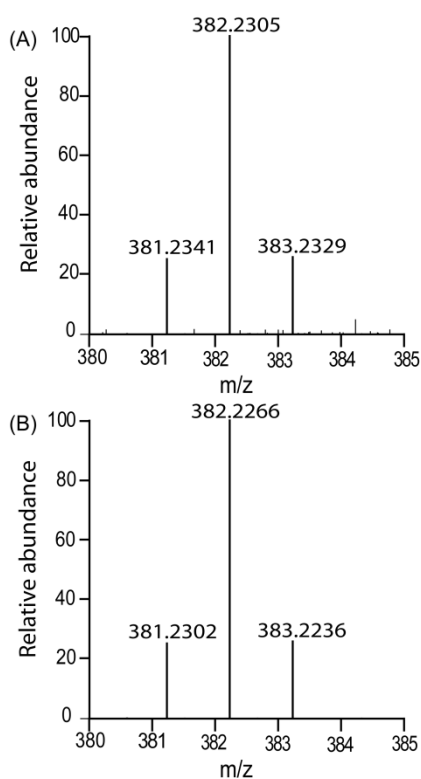

Fig. S1. Isotopic distribution of the (A) experiment and (B) theoretical MS (ESI) of [Py-BDP +H]<sup>+</sup>

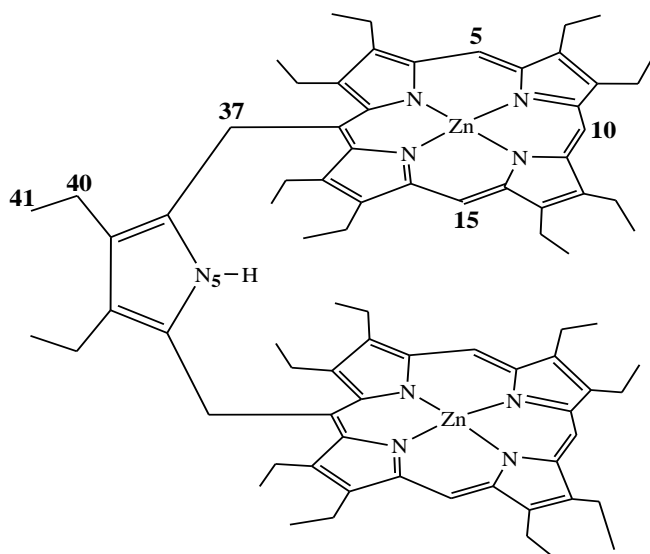

Fig. S2: The numbering schemes of Zn<sub>2</sub>DEP used in the <sup>1</sup>H NMR assignments.

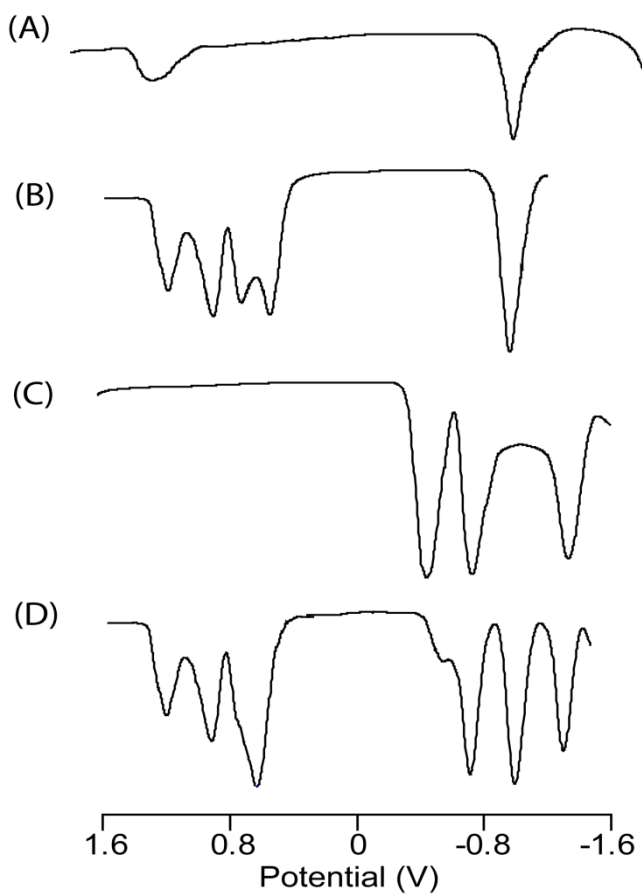

Fig. S3. Difference pulse voltammogram (298 K in CH<sub>2</sub>Cl<sub>2</sub>) of (A) Py-BDP, (B) **2**, (C) TNF and (D) **3**.

**Scheme S4**

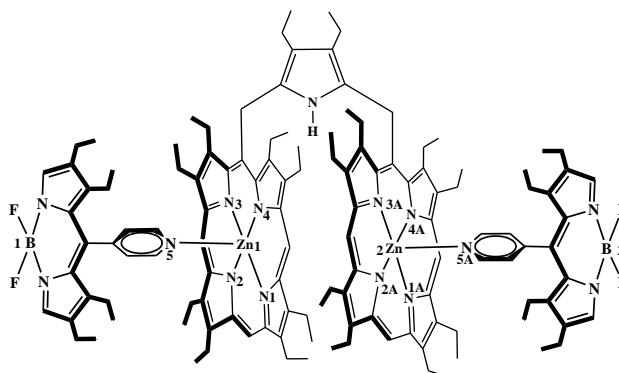

**Table S1.** Computed bond distances (Å) for dyad, **2**

| Bond distance | PBE0/LANL2TZ/D-95V |
|---------------|--------------------|
| Zn1-N1        | 2.093              |
| Zn1-N2        | 2.095              |
| Zn1-N3        | 2.089              |
| Zn1-N4        | 2.092              |
| Zn1-N5        | 2.215              |
| Zn1-B1        | 9.512              |
| Zn2-N1A       | 2.095              |
| Zn2-N2A       | 2.098              |
| Zn2-N3A       | 2.086              |
| Zn2-N4A       | 2.085              |
| Zn2-N5A       | 2.224              |
| Zn2-B2        | 9.499              |
| Zn1-Zn2       | 7.058              |

**Scheme S5**

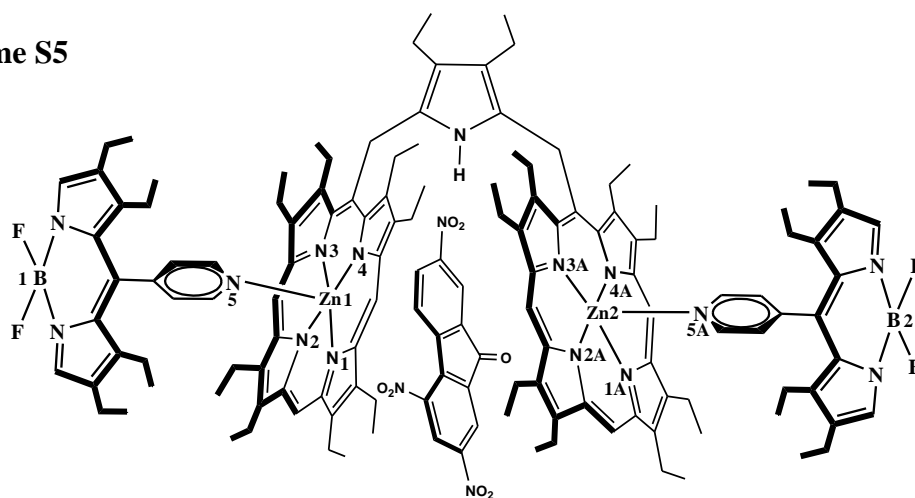

**Table S2.** Computed bond distances (Å) for triad, **3**

| Bond distance | PBE0/LANL2TZ/D-95V |
|---------------|--------------------|
| Zn1-N1        | 2.094              |
| Zn1-N2        | 2.093              |
| Zn1-N3        | 2.084              |
| Zn1-N4        | 2.090              |
| Zn1-N5        | 2.203              |
| Zn1-B1        | 9.498              |
| Zn2-N1A       | 2.094              |
| Zn2-N2A       | 2.097              |
| Zn2-N3A       | 2.083              |
| Zn2-N4A       | 2.097              |
| Zn2-N5A       | 2.204              |
| Zn2-B2        | 9.502              |
| Zn1-Zn2       | 7.434              |
